# Supplementary material for: Detection of pulmonary surfactant protein A by using an aptamer-based liquid crystal biosensor
Source: Royal Society of Chemistry journal article supplement (doi:10.1039/c8ay00326b), 2018-01-01
Supplement: c8ay00326b1.pdf [file c8ay00326b1.pdf]

## Electronic Supplementary Material

### Detection of human pulmonary surfactant protein A by using aptamer-based liquid crystal biosensor

Ying Wang<sup>a,b</sup>, Bing Wang<sup>c</sup>, Qingli Zhang<sup>b</sup>, Xingliang Xiong<sup>\*,b</sup> and Shixiong Deng<sup>\*\*,b</sup>

<sup>a</sup> School of Medical Information Engineering, Jining Medical University, Shandong

Rizhao 276826, PR China

<sup>b</sup> Laboratory of Biomedical Engineering, Chongqing Medical University, Chongqing

400016, PR China

<sup>c</sup> Hospital of Traditional Chinese Medicine in Rizhao City, Rizhao 276800, PR China

\* Corresponding author: Xingliang Xiong

E-mail address: xiongxingliang7212@163.com

\*\* Corresponding author:

E-mail address: dengshixiong1963@163.com

Correspondence to: Chongqing Medical University, No.1, Yixueyuan Road, Yuzhong

district, Chongqing 400016, PR China.

---

<sup>a</sup> School of Medical Information Engineering, Jining Medical University, Shandong Rizhao 276826, PR China

<sup>b</sup> Laboratory of Biomedical Engineering, Chongqing Medical University, Chongqing 400016, PR China

<sup>c</sup> Hospital of Traditional Chinese Medicine in Rizhao City, Rizhao 276800, PR China

\* Corresponding author:

E-mail address: xiongxingliang7212@163.com

\*\* Corresponding author:

E-mail address: dengshixiong1963@163.com

Fig. S1

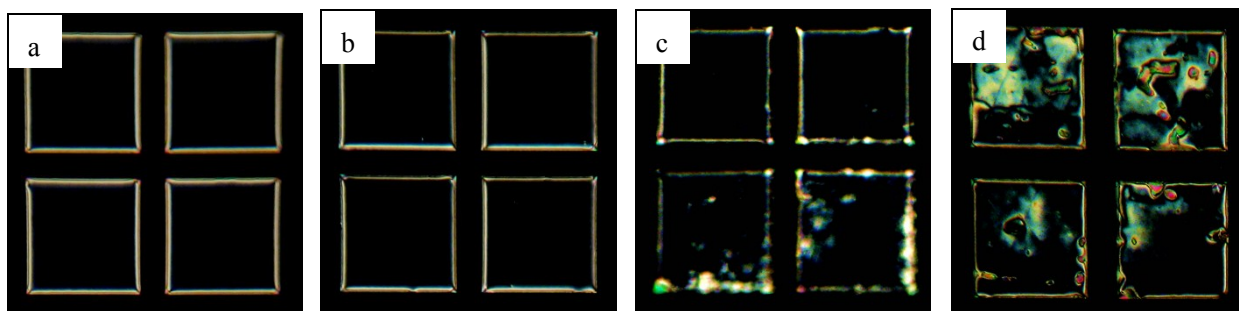

**Fig. S1** Optical images of the 5CB supported on the substrates modified with different ratio of APTES/DMOAP: (a) 5:1, (b) 10:1, (c) 15:1, (d) 20:1.
